# Supplementary material
Source: Springer Nature journal article supplement (https://www.springermedizin.de/resource/supplementary/13014_2007_97_MOESM1_ESM.pdf/9632976)

### GTV-T

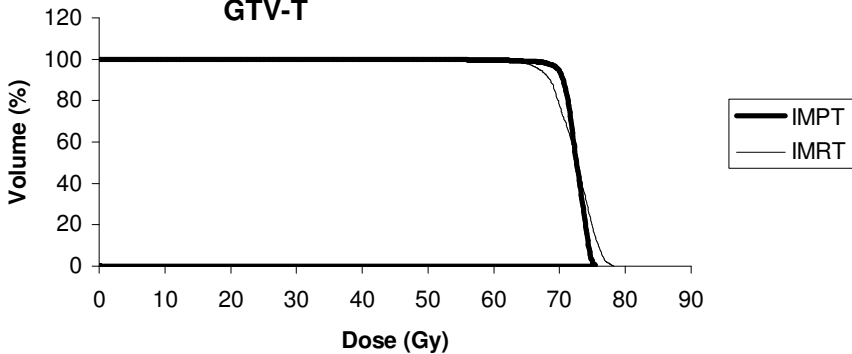

### PTV-TN

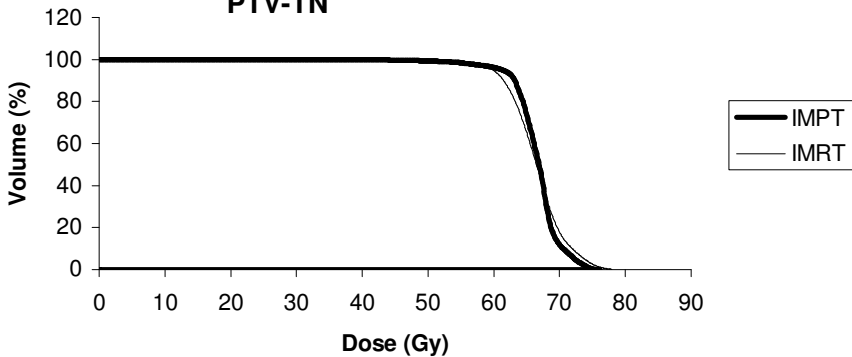

### PTV-N

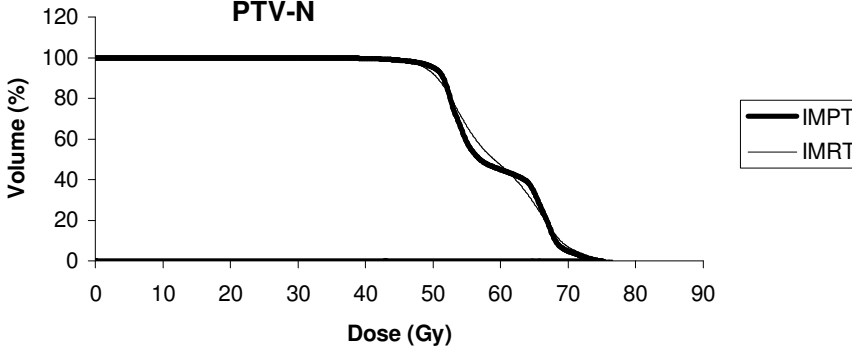

Supplement: MOESM1 [file 9632976]
